# Supplementary material
Source: publisher figshare collection journal article supplement (https://karger.figshare.com/ndownloader/files/27964539)
Supplement: Supplementary file 1 [file 27964539]

Supplementary Table 1. Process and contents of individualized counseling in the Social Nutrition Program

| Process | Session | Individualized  Dietary Counseling | Individualized  Social Support Counseling |
| --- | --- | --- | --- |
| Sharing | 1 | • Introducing the program in general  • Explaining how to use nutritional supplements | • Making a commitment to participate in all sessions of the program  • Encouragement to establish membership |
| Searching | 2 | • Searching for food choice values  • Educating on the 5 basic food groups and protein-enriched foods | • Searching for social support networks  • Identifying problems and personal needs |
| 3 | • Searching for food choice barriers  • Identifying the key factors of chronic undernutrition | • Searching for social network barriers  • Identifying the key resources to expand his or her social network |
| Strengthening | 4 | • Sharing past experiences of success and failure in dietary intake  • Planning a goal to increase diet quality with interventionists | • Providing information and support to maintain his or her social network  • Planning a goal to expand social network with interventionists |
| 5 | • Sharing current experiences of success and failure in dietary intake  • Providing feedback to increase diet quality | • Sharing current experiences of success and failure in social activities  • Providing feedback to expand (or maintain) his or her social network |
| 6 | • Evaluating personal experiences in the program  • Planning a new goal to increase own diet quality (i.e., self-management plan) | • Providing assurance to keep up with his or her social relationships  • Planning a new goal to expand (or maintain) own social network (i.e., self-management plan) |
